# Supplementary material for: High-Precision Phenotyping of Grape Bunch Architecture Using Fast 3D Sensor and Automation
Source: Sensors (Basel). 2018 Mar 2;18(3):763. doi: 10.3390/s18030763 (PMC5876746; doi:10.3390/s18030763)
Supplement: Supplementary file 1 [file sensors-18-00763-s001.xlsx]

## Sheet: Supplementary Table 1
List of the used genotypes from mapping population GF.GA-47-42 x ‘Villard Blanc’ and the corresponding measurments
BAT = Berry Analysis Tool
TST = Trait Size Tool
n	Genotype	Number of Berries	BAT_Berries	#diameter	BAT_diameter	BAT_Vol	#Vol	BAT_Total.Vol	#Total Vol	#Convex hull volume	TST_Length	TST_Width	Grape width	Grape height
1	89-030-0049	82	99	16.1	16.5	2.29	2.23	227	183	626	121.8	126.3	130.09	115.399
2	89-030-0049	117	163	16.1	16.7	2.22	2.27	361	265	936	124	133.4	135.452	169.201
3	89-030-0049	130	138	16.1	16.5	2.22	2.23	306	290	922	135.6	138.6	134.126	147.935
4	89-030-0049	111	234	16.6	16.5	2.3	2.45	503	272	886	164.8	170	136.533	170.441
5	89-030-0049	176	122	16	17.4	2.61	2.2	319	387	1529	147.1	120.4	196.448	156.841
1	89-030-0051	158	184	14.2	13.8	1.28	1.59	235	251	917	140.5	135	135.847	156.553
2	89-030-0051	113	122	14.4	14.6	1.48	1.63	180	184	552	137.7	100	95.0154	166.475
3	89-030-0051	113	152	13.4	13	0.98	1.48	149	167	573	117.7	109.4	121.862	147.1
4	89-030-0051	141	202	14	13.5	1.27	1.55	256	218	989	126.8	133.7	140.179	132.525
5	89-030-0051	164	187	14.3	14.1	1.43	1.63	268	267	1083	140.6	127.3	150.098	150.454
6	89-030-0051	160	181	14.7	14.9	1.57	1.75	285	279	902	162.9	145.4	129.733	191.662
1	89-030-0054	42	43	14.2	14	1.38	1.64	59	69	296	143.9	123.6	72.769	172.748
2	89-030-0054	128	136	13.4	13.4	1.22	1.29	166	165	611	147.5	92.7	114.73	158.526
3	89-030-0054	84	95	14.5	14.3	1.5	1.63	142	137	348	137.9	75.6	86.1778	141.972
4	89-030-0054	129	162	13.6	13.1	1.13	1.37	183	177	822	120.4	109.5	124.273	191.983
5	89-030-0054	97	105	13.3	13.1	1.14	1.31	120	128	537	126.3	84.7	102.558	185.429
6	89-030-0054	54	61	14.2	14.1	1.43	1.59	87	86	244	99.7	91	80.6907	120.498
1	89-030-0057	222	254	13.9	13.4	1.21	1.47	308	326	1335	172.9	141.9	146.155	194.905
2	89-030-0057	159	190	14.1	13.7	1.3	1.52	246	242	885	157.2	109.5	134.791	171.912
3	89-030-0057	173	176	13.5	12.9	1.07	1.39	188	241	1194	121.6	146.8	139.629	187.072
4	89-030-0057	213	261	14.6	14.1	1.4	1.68	367	357	1476	159.2	147.1	151.855	179.907
5	89-030-0057	133	162	15.4	15.5	1.85	1.98	299	264	861	137.6	141.9	139.04	146.666
6	89-030-0057	232	280	15	14.9	1.67	1.81	463	421	1483	169.9	153.4	146.281	191.551
1	89-030-0063	83	90	13	12.8	1.1	1.35	99	112	435	140.3	93.9	95.8345	151.941
2	89-030-0063	125	142	13.2	12.4	0.97	1.38	138	173	628	165.1	130.3	104.213	169.939
3	89-030-0063	122	123	13.1	13.5	1.27	1.31	156	160	710	169.8	91.6	96.0386	196.764
4	89-030-0063	125	103	12.5	12.8	1.06	1.3	109	163	724	179.1	109.5	108.744	189.3
5	89-030-0063	232	331	10	9	0.36	0.57	119	133	738	133.4	110.3	106.746	178.577
6	89-030-0063	127	122	9.2	8.9	0.36	0.52	44	65	422	143.2	121.4	108.681	160.987
1	89-030-0098	117	133	15.8	15.7	1.94	2.13	259	249	1019	152.5	137.2	134.496	175.49
2	89-030-0098	123	145	15.6	16.1	2.11	2.02	306	248	942	138.3	144.3	148.609	142.592
3	89-030-0098	128	150	15.3	15.4	1.84	1.92	275	245	723	114.5	145.6	131.43	118.031
4	89-030-0098	93	138	14.9	14.3	1.49	1.87	205	174	661	114.8	125.6	129.656	132.238
5	89-030-0098	144	161	15	14.9	1.66	1.83	267	263	904	153.2	127.9	150.164	167.66
1	89-030-0129	98	172	14.1	13.4	1.22	1.53	210	150	564	131.6	97.3	115.987	159.17
2	89-030-0129	79	110	13.6	12.2	0.93	1.41	102	111	453	112.7	97.5	113.198	181.869
3	89-030-0129	95	200	13.8	11.6	0.79	1.42	157	135	498	142.2	95.2	100.009	164.066
1	89-030-0147	132	165	13.1	13.9	1.34	1.23	221	162	550	113.2	97.6	117.264	126.375
2	89-030-0147	204	262	13.6	13.7	1.28	1.36	337	277	947	153.4	127.4	122.544	150.949
3	89-030-0147	192	232	14.4	14.3	1.47	1.61	340	309	1041	153.4	120.7	147.186	174.351
4	89-030-0147	100	114	14.7	15	1.7	1.72	193	172	472	130.1	96.9	99.085	149.355
5	89-030-0147	58	75	15.3	14.9	1.68	1.94	126	113	323	125.3	65.5	77.8078	132.664
6	89-030-0147	140	130	14.4	15.4	1.85	1.63	240	229	719	120.8	119.9	110.863	143.116
1	89-030-0181	224	278	14.5	14.45	1.52	1.67	421	374	1669	171.1	133.4	144.752	240.012
2	89-030-0181	214	234	14.5	14.6	1.57	1.72	368	368	1666	204	139.3	144.264	250.647
3	89-030-0181	238	247	14.3	14.6	1.56	1.66	386	395	1496	210.6	140.7	127.819	248.584
4	89-030-0181	211	248	14.7	14.4	1.47	1.73	366	364	1426	196.6	131.8	141.925	182.06
5	89-030-0181	170	193	13.8	13.8	1.32	1.47	254	250	1192	182.1	142.2	130.748	196.704
6	89-030-0181	93	102	14.5	14.5	1.54	1.66	157	155	601	190.1	118	92.4382	192.313
1	89-030-0201	104	123	14	13.7	1.32	1.53	162	159	457	143.9	93.3	83.6942	148.506
2	89-030-0201	108	132	13.8	13.6	1.27	1.43	167	155	510	133.5	87.6	90.9539	204.414
3	89-030-0201	63	81	13.8	13.1	1.11	1.41	90	89	295	125.6	73.5	70.9403	169.246
4	89-030-0201	100	137	13.7	13.2	1.16	1.47	159	147	585	185.9	93.6	117.907	212.464
5	89-030-0201	185	238	14.2	13.1	1.09	1.56	261	289	1167	166.1	101.5	119.695	242.825
6	89-030-0201	93	126	13.7	12.8	1.05	1.46	132	136	485	175.9	69.4	89.6744	193.78
1	89-030-0223	217	278	12.8	14.9	1.1	1.19	286	258	1173	158.4	124.3	123.141	199.58
2	89-030-0223	159	189	14.8	14.9	1.67	1.77	316	282	1192	126.9	148.8	151.67	192.951
3	89-030-0223	215	270	14.3	14.2	1.45	1.6	388	344	1138	154.8	147	139.134	177.191
4	89-030-0223	284	420	14.4	14.37	1.49	1.6	621	455	2182	181.1	165.3	159.527	220.504
5	89-030-0223	234	294	15.2	15.45	1.85	1.88	539	439	1542	190	139.1	158.415	202.365
6	89-030-0223	245	352	15.6	15.53	1.88	2.06	666	504	1879	179.8	164.9	165.829	175.127
1	89-030-0251	206	263	15.1	14.9	1.67	1.84	442	380	1267	131.9	128.5	146.953	182.046
2	89-030-0251	94	86	14.5	15.4	1.86	1.9	160	178	657	161.2	143	98.7254	194.949
3	89-030-0251	213	273	14.4	14.45	1.52	1.61	422	342	1264	139.8	146.6	152.332	183.293
4	89-030-0251	151	173	15.9	15.85	1.99	2.15	345	324	1256	183.2	129.8	140.185	190.883
5	89-030-0251	165	200	14.9	15.2	1.78	1.78	358	293	888	157.5	108	147.371	174.591
6	89-030-0251	155	189	14.3	13.8	1.32	1.56	249	243	705	120.8	146.9	109.259	151.875
1	89-030-0266	123	157	16.1	15.9	2.06	2.24	324	275	1061	135.1	113.2	151.904	124.86
2	89-030-0266	107	126	15.3	15.1	1.78	1.94	224	207	776	117	133.3	130.765	150.55
3	89-030-0266	92	88	15.8	16.2	2.18	2.22	192	204	625	167.8	146.9	131.063	134.614
4	89-030-0266	218	264	14.4	14.1	2.79	1.7	374	371	1217	128.5	135.8	132.083	186.37
5	89-030-0266	191	244	13.9	13.1	1.13	1.46	276	279	914	130.8	132.4	140.491	159.777
1	89-030-0273	296	477	14.3	14.2	1.43	1.58	678	467	1985	167.5	169.8	153.888	199.42
2	89-030-0273	231	345	14.1	14.3	1.46	1.55	504	358	1305	181.5	153.5	154.564	183.374
3	89-030-0273	193	262	15.4	15.25	1.78	1.96	475	378	1271	168.2	133.6	129.28	175.403
4	89-030-0273	137	183	15.3	14.9	1.68	1.93	308	264	837	161.3	121.1	136.544	160.789
5	89-030-0273	136	191	14.1	13.9	1.35	1.51	259	206	790	132.3	120.4	116.893	165.665
1	89-030-0349	76	73	11.19	11.6	0.79	1.06	58.01	80.72	671.79	227.5	140	128.16	211.09
2	89-030-0349	89	51	10.4	13.1	1.16	0.95	59	85	851	164.9	140.7	145.303	163.794
3	89-030-0349	111	106	14.1	14.9	1.68	1.68	179	186	1390	201.5	99.7	170.296	184.57
4	89-030-0349	98	97	15	15.1	1.79	1.82	174	179	1041	186	106.7	147.861	194.31
5	89-030-0349	104	104	13.4	13.4	1.21	1.36	126	141	646	166.2	98	99.9977	183.919
1	89-030-0358	183	209	12.3	12.2	0.88	1.13	184	206	1341	161	117.6	145.491	188.76
2	89-030-0358	161	189	14.1	13.8	1.34	1.52	254	244	1102	142.1	114.3	142.761	173.663
3	89-030-0358	93	93	13.2	13.5	1.17	1.26	108	118	498	123.5	72.8	102.67	180.869
4	89-030-0358	127	136	14	13.8	1.32	1.5	180	191	1019	126.8	108.6	139.816	143.786
5	89-030-0358	122	129	13.8	14.1	1.41	1.46	182	179	735	111.3	120.9	132.059	128.924
6	89-030-0358	114	120	13.3	13.3	1.17	1.28	140	146	605	136.9	86.8	107.291	147.84
1	89-030-0371	72	73	15.6	15.8	2.01	2.02	147	146	421	125.2	96.2	94.2842	140.707
2	89-030-0371	56	52	14.1	14.7	1.62	1.82	84	102	344	106.7	71.8	85.8116	140.052
3	89-030-0371	55	54	15	15.9	2.05	1.95	111	107	306	147	72.7	82.0682	136.568
4	89-030-0371	70	118	13.7	13.6	1.27	1.43	150	100	435	178.2	109.4	123.802	147.189
5	89-030-0371	107	123	14.7	14.7	1.62	1.79	199	191	727	140.9	121.7	123.156	165.693
6	89-030-0371	87	101	15.1	15.8	2	1.94	202	169	624	169.7	88.5	108.439	190.326
1	89-030-0405	208	263	12.3	12.4	0.91	1.24	240	257	1887	238.1	130.1	167.924	247.725
2	89-030-0405	244	282	14.6	15.05	1.62	1.71	460	417	2556	233	159.1	184.379	254.411
3	89-030-0405	255	305	14.1	15.25	1.7	1.71	511	435	3096	261.9	148.4	199.284	276.959
4	89-030-0405	195	217	14.2	14.7	1.51	1.68	311	327	1758	184.8	153.9	160.322	202.297
5	89-030-0405	127	138	15.4	16.8	2.29	2.05	316	260	1376	157.9	130.7	175.886	163.742
6	89-030-0405	120	128	15.3	17	2.34	1.92	299	231	1108	147.5	127.9	123.85	195.475
1	89-030-0434	173	215	12.9	12.7	1.01	1.16	218	201	760	127.3	113.6	135.939	149.331
2	89-030-0434	192	250	12	12.6	0.74	0.95	185	182	642	140	104	107.602	156.244
3	89-030-0434	146	172	13.1	12.3	0.95	1.25	163	182	608	135.4	130	113.204	150.228
4	89-030-0434	157	201	13.2	13	1.08	1.25	217	196	654	146.5	103.9	118.09	139.619
5	89-030-0434	147	186	13	13	1.05	1.19	196	175	573	135.8	125.4	113.088	128.25
6	89-030-0434	103	117	13.3	13.2	1.16	1.28	135	132	389	117.2	110.6	111.867	113.842
1	89-030-0505	63	99	12.1	12	0.82	1.1	82	69	668	159.5	145.8	146.332	180.59
2	89-030-0505	94	110	13.6	13.5	1.2	1.39	132	131	688	164.8	97.3	109.031	195.729
3	89-030-0505	83	131	12.8	13.2	0.97	1.2	128	99	407	107.6	98.9	109.064	121.087
4	89-030-0505	116	138	10.1	12.8667	0.57	0.58	79	67	279	148	71.7	80.3811	166.709
5	89-030-0505	134	155	11.4	10.9	0.87	0.82	134	110	454	158.4	100.6	99.4913	178.038
6	89-030-0505	113	126	10.8	12	0.59	0.69	75	78	356	150.9	79.6	75.8625	186.899
1	89-030-0514	139	180	13.9	13.6	1.24	1.46	223	203	786	140	135	121.659	151.852
2	89-030-0514	159	224	12.7	13	0.98	1.14	220	181	796	113.3	133.6	142.254	156.298
3	89-030-0514	190	265	13.4	13.4	1.16	1.33	307	252	1256	152.6	126.7	150.962	143.023
4	89-030-0514	215	260	12.4	12.1	0.9	1.04	233	225	827	131.9	125.9	152.065	139.397
5	89-030-0514	216	285	13.4	13.4	1.12	1.32	320	285	1087	126.1	133	147.815	155.555
6	89-030-0514	179	198	13.7	13.4	1.21	1.39	240	249	773	123.9	119.9	133.392	148.845
1	89-030-0533	175	237	14.5	14.2	1.48	1.67	350	292	1140	162.6	136.9	143.807	179.15
2	89-030-0533	111	126	15	14.3	1.49	1.83	187	203	687	138.6	128.4	104.042	209.963
3	89-030-0533	166	189	14.5	14.2	1.46	1.66	275	275	948	165.7	95.7	119.353	209.464
4	89-030-0533	151	186	14.4	14	1.42	1.61	263	243	873	195.2	96.3	115.892	185.893
5	89-030-0533	130	143	14.4	14.3	1.48	1.63	211	212	702	118.2	103.8	114.188	200.738
6	89-030-0533	129	135	14.2	14.1	1.43	1.56	192	201	786	171.8	94.5	114.105	234.657
1	89-030-0540	121	154	12.5	12.2	0.93	1.09	144	132	565	145.5	89.8	125.82	113.775
2	89-030-0540	107	145	11.6	11.5	0.75	0.89	109	95	574	151.2	68	101.515	160.904
3	89-030-0540	87	120	11.6	11.5	0.77	0.9	92	78	321	178.2	155.8	75.4536	142.712
4	89-030-0540	119	167	11.8	11.6	0.78	0.91	130	109	463	121.7	91.7	102.411	131.736
1	89-030-0560	183	252	12.4	12.3	0.79	1.03	200	188	768	176.3	114.6	114.251	175.812
2	89-030-0560	235	313	12.8	12.1	0.83	1.15	259	270	1283	144	91	139.99	216.992
3	89-030-0560	150	200	12.2	12.4	0.93	0.99	187	149	559	174.4	104.5	103.208	167.03
4	89-030-0560	122	148	12.7	12.1	0.89	1.14	131	139	555	124	123	112.679	172.671
5	89-030-0560	192	277	11.9	13.5	0.84	0.93	232	178	755	137.5	108.3	106.28	189.807
1	89-030-0563	141	197	13.8	13.8	1.34	1.42	263	201	800	118.2	115.7	128.391	138.055
2	89-030-0563	118	137	14.4	14.3	1.49	1.65	204	195	595	128.8	108.3	111.822	148.036
3	89-030-0563	120	159	14.8	15	1.72	1.77	273	212	700	163.2	144.1	138.216	118.324
4	89-030-0563	137	178	14.8	15	1.69	1.76	301	241	798	136.1	128.8	127.137	142.616
5	89-030-0563	227	346	14.1	14.3	1.44	1.51	499	344	1215	171.5	139.3	147.038	174.398
6	89-030-0563	159	212	14.1	14.2	1.44	1.52	306	242	757	150	156.4	125.241	154.521
1	89-030-0573	122	264	14.4	13.65	1.28	1.65	355	202	722	134.5	100.7	118.719	170.283
2	89-030-0573	224	357	14.4	14.05	1.38	1.64	494	367	1530	150.9	138.6	152.858	193.14
3	89-030-0573	92	140	15.4	14.8	1.61	2	226	184	558	108.4	136.7	102.69	158.07
4	89-030-0573	187	261	14.1	13.5	1.25	1.55	354	290	1046	152.8	168.6	149.756	160.691
5	89-030-0573	151	215	14.6	14.4	1.46	1.71	315	258	886	139.7	134.8	144.992	120.796
6	89-030-0573	244	431	14.5	13.5	1.24	1.7	535	414	1953	131.5	114.3	175.635	178.262
1	89-030-0575	130	204	15.3	14.8	1.61	1.92	329	249	787	121.9	120.7	126.121	138.204
2	89-030-0575	108	163	15.4	14.7	1.55	1.97	252	212	766	140.5	133.5	123.91	153.588
3	89-030-0575	124	175	14.6	13.9	1.38	1.74	242	216	750	140.6	160.1	109.072	163.839
4	89-030-0575	145	198	15	14.5	1.5	1.81	296	262	835	144.9	129.3	143.511	141.753
5	89-030-0575	194	282	14.7	14.3	1.41	1.73	402	335	1164	134.7	140.1	150.535	169.684
6	89-030-0575	127	181	15	14.2	1.44	1.84	261	234	860	140.9	136.8	121.621	201.705
1	89-030-0586	134	178	15.4	15.2	1.79	2	318	268	943	124.6	151	120.674	168.405
2	89-030-0586	157	211	15.3	15.8	1.94	1.95	429	306	878	128.5	148.9	154.274	134.213
3	89-030-0586	166	237	15	14.3	1.47	1.86	358	308	1149	135.3	129.3	148.363	143.733
4	89-030-0586	130	175	14.4	13.6	1.31	1.63	229	212	821	145.1	148.5	137.609	147.721
5	89-030-0586	120	158	14.6	14.1	1.41	1.72	222	207	637	155.7	116.5	113.069	130.539
6	89-030-0586	114	164	13.9	13	1.08	1.52	177	173	713	141.8	140	117.165	152.533
1	89-030-0588	130	167	14.5	13.7	1.34	1.62	223	210	616	153	135.1	117.802	131.203
2	89-030-0588	153	186	14.4	13.9	1.36	1.6	254	245	895	150.4	122.9	143.652	146.526
3	89-030-0588	185	238	14.4	14.2	1.42	1.61	337	297	915	175.1	127.2	126.33	153.431
4	89-030-0588	154	251	15.4	15.3	1.84	1.96	461	302	1168	140.8	77.6	124.616	236.327
5	89-030-0588	209	249	14.1	14.25	1.46	1.54	364	322	1210	151.6	125.2	139.576	179.415
6	89-030-0588	210	256	14.1	13.65	1.29	1.54	335	324	1360	152.8	144.5	152.401	174.197
5	89-030-0588	166	215	14.3	14.1	1.39	1.58	300	262	850	144.7	126.3	144.195	129.493
1	89-030-0594	44	31	11.7	11.9	0.85	1.25	26	55	243	118.6	63.4	78.0017	180.302
2	89-030-0594	121	127	11	10.7	0.62	0.95	79	115	657	119.5	77.7	109.439	193.831
3	89-030-0594	73	86	11	10.3	0.57	0.98	49	72	244	114.4	58.9	71.8722	147.401
4	89-030-0594	40	40	15.2	15.3	1.86	1.89	74	76	252	152.8	59.8	73.2359	151.734
5	89-030-0594	12	11	14	7.6	0.21	1.59	2	19	129	122.5	73.2	64.0884	130.582
6	89-030-0594	26	19	14.8	14.4	1.55	1.85	29	48	234	114.9	152.9	78.0946	189.573
1	89-030-0596	62	46	12.7	14.1	1.42	1.4	65	87	372	129.1	98.5	86.0581	122.021
2	89-030-0596	120	156	13.9	14.1	1.38	1.53	216	184	832	131	137	177.413	140.957
3	89-030-0596	102	115	14.1	14.1	1.43	1.5	165	153	509	123.8	94	105.491	135.531
4	89-030-0596	156	188	14.2	13.8	1.34	1.54	251	240	1121	110.3	112.9	153.456	143.072
5	89-030-0596	75	77	15.3	14.7	1.62	1.93	124	145	426	112.7	124.8	104.326	132.999
6	89-030-0596	65	57	11.9	12	0.87	1.2	49	78	480	162.7	143.1	108.899	152.987
1	89-030-0621	80	87	15.9	16.2	2.17	2.26	189	181	777	143.7	106.2	123.428	151.768
2	89-030-0621	85	90	16	16.3	2.21	2.25	199	192	731	124.7	87.3	111.696	164.532
3	89-030-0621	90	104	16.1	16.7	2.37	2.32	246	208	823	167.5	112	124.009	188.996
4	89-030-0621	70	72	15.3	15.4	1.89	1.97	136	138	672	153.3	125.3	110.698	182.415
5	89-030-0621	119	123	14.4	14.8	1.64	1.64	201	195	798	103.3	140	117.064	166.582
1	89-030-0625	166	224	13.7	13.65	1.3	1.42	297	236	1131	167.8	142.7	148.11	154.629
2	89-030-0625	166	184	13.4	13.6	1.27	1.31	233	217	837	179.4	123.8	164.352	110.165
3	89-030-0625	224	264	13.2	13.8	1.32	1.25	348	281	1126	133.7	126.5	156.488	163.314
4	89-030-0625	159	178	13.8	13.6	1.28	1.43	229	227	773	172.3	147.3	119.488	157.801
5	89-030-0625	210	237	13.6	13.75	1.3	1.36	310	285	1182	141.4	134.5	144.78	173.127
6	89-030-0625	322	403	12.9	12.6	1.02	1.17	403	375	1471	147	129.7	146.981	162.14
1	89-030-0639	191	247	13.5	13.5	1.24	1.32	306	253	1055	131.1	143.5	127.037	170.95
2	89-030-0639	198	242	13.9	14.05	1.42	1.53	336	303	1139	100.3	116.7	136.582	141.736
3	89-030-0639	183	253	11.9	11.3	0.73	1.04	184	191	1128	158.9	134.4	138.943	209.495
4	89-030-0639	118	149	13.7	13.1	1.14	1.51	170	178	807	124.6	99.4	110.48	166.354
5	89-030-0639	201	309	11.4	10.4	0.57	0.93	176	186	966	157.6	119.5	136.546	185.606
6	89-030-0639	88	106	12.3	11.9	0.86	1.2	91	106	556	159.9	143.2	94.4853	188.522
1	89-030-0640	125	162	14.5	15.2	1.75	1.65	283	207	720	143.9	108.8	114.795	152.577
2	89-030-0640	139	196	14.6	14.7	1.52	1.72	298	239	772	156.8	144.6	137.961	140.544
3	89-030-0640	107	144	14.9	15.7	1.92	1.79	276	191	569	138	95.9	116.966	151.122
4	89-030-0640	119	139	14.4	14.4	1.47	1.63	205	194	551	85.7	92.5	102.576	137.802
5	89-030-0640	102	151	14.3	15.2	1.71	1.59	259	162	497	66.7	70.7	116.574	130.051
1	89-030-0643	66	77	14.3	14.4	1.51	1.89	116	125	493	85.1	66.7	108.68	146.33
2	89-030-0643	45	30	10	11.2	0.68	0.8	20	36	169	119	99.4	73.6659	128.612
3	89-030-0643	42	36	11.3	12.3	0.94	1.18	34	50	217	121.1	107.8	76.3436	136.142
4	89-030-0643	64	79	16.4	16.5	2.32	2.36	183	151	478	121.8	110.6	90.9994	160.979
5	89-030-0643	105	124	15.6	15.6	1.92	2.04	239	214	651	140.8	87.9	125.77	148.193
6	89-030-0643	76	94	16.9	16.5	2.31	2.54	217	193	688	107.9	120.7	116.148	172.509
1	89-030-0657	104	144	11.8	11.4	0.75	0.92	108	96	394	115	78.8	100.531	147.882
2	89-030-0657	113	153	12.4	11.6	0.79	1.13	121	128	629	174.4	118.6	109.027	158.483
3	89-030-0657	84	125	10.9	10.5	0.58	0.81	73	68	250	147.2	88.6	73.5702	124.636
4	89-030-0657	181	207	13	12.8	1.07	1.24	222	224	893	190.9	125	123.487	206.132
5	89-030-0657	138	171	13	12.3	0.94	1.22	161	169	695	158.1	145	113.07	152.496
6	89-030-0657	248	332	12.3	12.2	0.92	1.07	305	265	1192	136.1	119.7	139.749	181.843
1	89-030-0680	202	265	14.2	14.35	1.51	1.56	403	316	1169	164.5	140.7	149.127	183.237
2	89-030-0680	142	179	14.6	14.55	1.55	1.69	280	241	678	99.4	144.1	118.687	139.152
3	89-030-0680	307	491	12.3	11.7	0.82	1.03	408	316	1453	116.8	96.6	158.933	216.602
4	89-030-0680	115	162	14.9	14.7	1.58	1.79	256	206	731	122.5	146.4	148.793	105.982
5	89-030-0680	107	130	15	15.3	1.77	1.82	231	194	556	131.6	102.9	109.489	128.448
6	89-030-0680	141	181	14.4	14	1.38	1.62	250	229	814	149.2	85.7	136.045	134.024
1	89-030-0683	118	150	12.4	11.7	0.81	1.06	121	125	621	126	80.8	115.474	152.545
2	89-030-0683	86	88	12.8	12.3	0.96	1.16	84	100	432	144.4	70	100.289	169.515
3	89-030-0683	79	83	12.2	11.8	0.83	1	69	79	339	164	65.9	80.2144	132.62
4	89-030-0683	44	43	12.4	11.5	0.78	1.05	33	46	306	131.1	94	72.2837	189.288
5	89-030-0683	54	65	12.9	10.9	0.64	1.43	42	77	322	148.7	113.2	86.7005	173.972
6	89-030-0683	40	39	14.8	14.5	1.53	1.83	60	73	248	151	113.9	61.8221	160.755

## Sheet: Supplementary Table 2
Cultivar and bunch structure specific results of the correlation analysis
				Pinot Noir
		3D-BT					Ground Truth
Trait	min	mean	max	r2	P-value	min	mean	max	Mean Difference
Number of Berries	85	120	187	0.98	<.0001	86	131	219	-11
Berry Diameter [mm]	12.3	13.1	13.9	0.58	<.05	12.5	13.2	13.9	-0.1
Berry Volume [ml]	1.02	1.23	1.55	0.7	<.05	0.96	1.13	1.34	0.1
Total Berry Volume [ml]	97	146	215	0.86	<.0001	90	152	242	-6
Convex Hull/Total Berry Volume [ml]	279	476	828	0.82	<.0001	90	152	242	324
Grape Width [mm]	81.33	99.32	119.88	0.82	<.0001	70.7	100.63	141.8	-1.31
Grape Height [mm]	113.1	145.4	167.8	0.85	<.0001	114.7	146.7	172.6	-1.3
n = 19
	denser bunch structure, higher amount of mixed-size berries
				Calardis Blanc
		3D-BT					Ground Truth
Trait	min	mean	max	r2	P-value	min	mean	max	Mean Difference
Number of Berries	103	164	308	0.94	<.0001	132	197	365	-33
Berry Diameter [mm]	9.9	10.65	11.5	0.55	0.05	10.2	11.4	12.5	-0.75
Berry Volume [ml]	0.53	0.66	0.844	0.48	<.0001	0.54	0.75	0.96	-0.09
Total Berry Volume [ml]	75	106	179	0.75	<.05	98	150	224	-44
Convex Hull/Total Berry Volume [ml]	284	446	913	0.76	<.05	98	150	224	296
Grape Width [mm]	77.11	98.02	122.86	0.83	<.05	71	96.52	123.9	1.5
Grape Height [mm]	115	141.4	180.4	0.9	<.0001	122.4	139.8	167.5	1.6
n = 13
info	looser bunch structure, high amount of small berries
				Riesling
		3D-BT					Ground Truth
Trait	min	mean	max	r2	P-value	min	mean	max	Mean Difference
Number of Berries	102	162	211	0.85	<.0001	112	169	225	7
Berry Diameter [mm]	10.9	12.1	12.8	0.62	<.05	11.2	12.32	13.2	0.22
Berry Volume [ml]	0.78	1	1.17	0.65	0.05	0.71	0.95	1.16	0.05
Total Berry Volume [ml]	111	161	204	0.91	<.0001	99	167	226	6
Convex Hull/Total Berry Volume [ml]	304	523	803	0.7	<.0001	99	167	226	356
Grape Width [mm]	83.06	106.45	145.55	0.51	<.05	71.9	103.59	133	2.86
Grape Height [mm]	107.5	137.8	172	0.34	0.1	117.8	139.4	172.2	1.6
n = 20
info	smaller, very dense bunch structure, high amount of small interior berries
				Dornfelder
		3D-BT					Ground Truth
Trait	min	mean	max	r2	P-value	min	mean	max	Mean Difference
Number of Berries	83	110	144	0.93	<.0001	89	120	175	10
Berry Diameter [mm]	13	14	15	0.84	<.0001	13.3	14.4	15.5	0.4
Berry Volume [ml]	1.2	1.5	1.8	0.76	<.0001	1.2	1.5	1.9	0
Total Berry Volume [ml]	114	168	246	0.95	<.0001	136	189	258	21
Convex Hull/Total Berry Volume [ml]	412	668	1280	0.78	<.0001	136	189	258	479
Grape Width [mm]	92.43	111.19	136.74	0.36	0.09	83.6	97.49	118.6	13.7
Grape Height [mm]	133.4	178	234.6	0.84	<.0001	125.8	168.4	218.3	9.6
n = 22
info	looser bunch structure
				loose bunch structure
		3D-BT					Ground Truth
Trait	min	mean	max	r2	P-value	min	mean	max	Mean Difference
Number of Berries	83	129	308	0.96	<.0001	89	149	365	20
Berry Diameter [mm]	9.9	12.8	15	0.97	<.0001	10.2	13.3	15.5	0.5
Berry Volume [ml]	0.53	1.2	1.82	0.96	<.0001	0.54	1.24	1.91	0.04
Total Berry Volume [ml]	75	145	246	0.87	<.0001	98	175	258	30
Convex Hull/Total Berry Volume [ml]	284	586	1280	0.82	<.0001	98	175	258	411
Grape Width [mm]	77.11	106.03	136.74	0.54	<.05	71	97.13	123.9	8.9
Grape Height [mm]	115	164.4	234.6	0.92	<.0001	122.4	159.8	218.3	4.6
n = 35
				dense bunch structure
		3D-BT					Ground Truth
Trait	min	mean	max	r2	P-value	min	mean	max	Mean Difference
Number of Berries	85	141	211	0.94	<.0001	86	150	225	9
Berry Diameter [mm]	10.9	12.6	13.9	0.8	<.0001	11.2	12.7	13.9	0.1
Berry Volume [ml]	0.78	1.1	1.5	0.82	<.0001	0.78	1.04	1.34	0.06
Total Berry Volume [ml]	97	154	215	0.89	<.0001	90	160	242	6
Convex Hull/Total Berry Volume [ml]	279	501	828	0.77	<.0001	90	160	242	341
Grape Width [mm]	81.33	102.98	145.55	0.63	<.0001	70.7	102.15	141.8	0.83
Grape Height [mm]	107.5	141.5	172	0.64	<.0001	114.7	143	172.6	1.5
n = 39

## Sheet: Supplementary Table 3
ANOVA Results of cultivar specific field scans
		Number of Berries	Berry diameter [mm]	Berry volume [ml]	Total Volume [ml]	Convex Hull	Grape Width [mm]	Grape Length [mm]
Calardis Blanc n = 12	360°	167A	11A	0.8A	118.6A	502.2A	111.4A	150.7A
	front	70B	11.4A	0.8A	56.1B	260.3B	87.9A	146.4A
	field	83B	11.8A	0.9A	74.4B	407.9AB	111.4A	152.2A
Dornfelder n = 12	360°	111A	14.2A	1.6A	176.5A	738.2A	113.1AB	185.2A
	front	57B	14.5A	1.7A	94.1B	371.4B	94.1B	176.1A
	field	69B	14.5A	1.7A	115.9B	601.6AB	124.1A	186.9A
Pinot Noir n = 12	360°	117A	13.4A	1.3A	151.4A	515.2A	101.5A	154.9A
	front	56B	13.7A	1.4A	81.6B	268.1B	92.2A	145.3A
	field	49B	14A	1.5A	74.2B	288.7B	102.6A	136.3A
Riesling n = 12	360°	155A	12.4A	1.1A	163.8A	543.8A	106.2A	145.7A
	front	78B	12.6A	1.1A	86.9B	260.3B	87.7A	139.6A
	field	63B	12.9A	1.2A	75.2B	338.4B	100.3A	147.9A
ɑ = 0.001
